# Supplementary material
Source: Springer Nature journal article supplement (https://www.springermedizin.de/resource/supplementary/12879_2008_832_MOESM4_ESM.pdf/9449886)

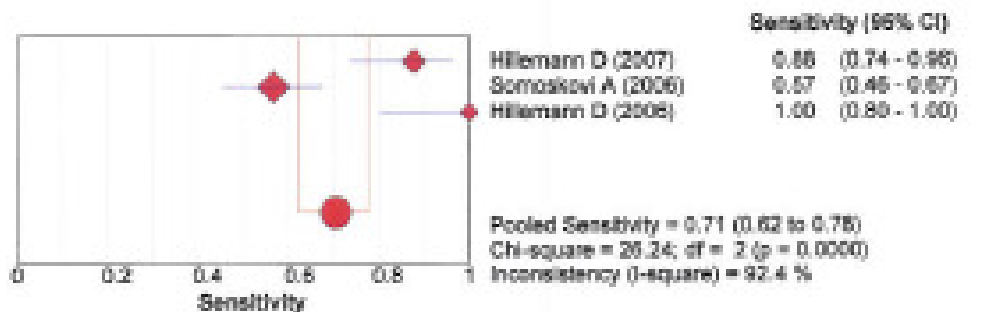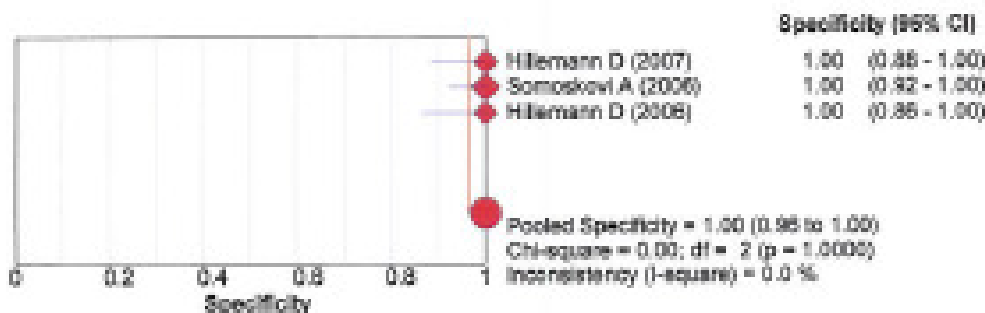

#### 4a) Genotype<sup>®</sup> MTBDR

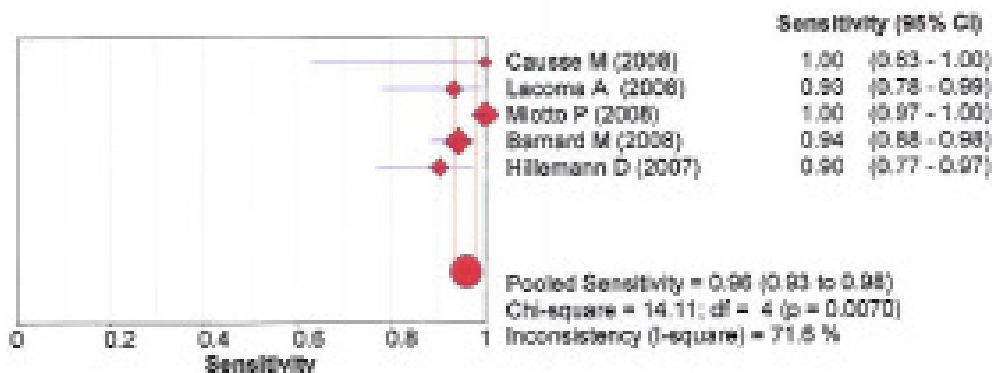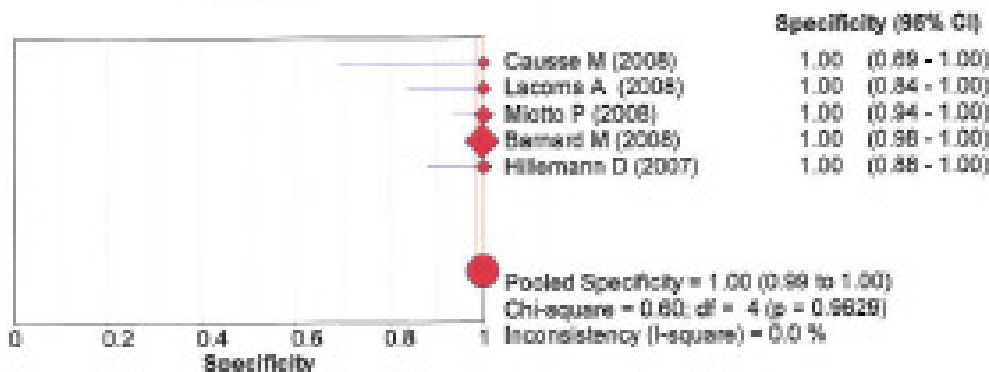

#### 4b) Genotype<sup>®</sup> MTBDRplus

Supplement: MOESM4 [file 9449886]
